# Supplementary material for: CRLF1 promotes malignant phenotypes of papillary thyroid carcinoma by activating the MAPK/ERK and PI3K/AKT pathways
Source: Springer Nature journal article supplement (doi:10.1038/s41419-018-0352-0), 2018-03-07

**A**

| Ranking | Gene Name | Log Fold Change | Ratio of Upregulation Compared to Normal Tissues |
|---------|-----------|-----------------|--------------------------------------------------|
| 1       | HOXA11    | 4.533853634     | 0.882352941                                      |
| 2       | TMEM132A  | 1.769596758     | 0.882352941                                      |
| 3       | ADRA2C    | 2.269786735     | 0.862745098                                      |
| 4       | TREML3    | 2.961794728     | 0.843137255                                      |
| 5       | GRIK3     | 2.928952261     | 0.803921569                                      |
| 6       | NXPH4     | 3.238465673     | 0.803921569                                      |
| 7       | PLXNA4    | 2.040243623     | 0.803921569                                      |
| 8       | CRLF1     | 4.494155322     | 0.784313725                                      |

**B**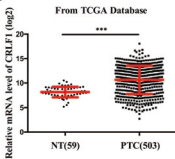**C**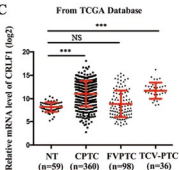**D**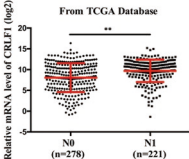**E**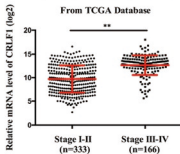**F**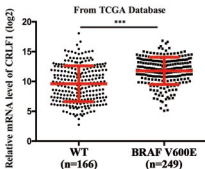

Supplement: 41419_2018_352_MOESM1_ESM.pdf [file 41419_2018_352_MOESM1_ESM.pdf]
