# Supplementary material for: CRLF1 promotes malignant phenotypes of papillary thyroid carcinoma by activating the MAPK/ERK and PI3K/AKT pathways
Source: Springer Nature journal article supplement (doi:10.1038/s41419-018-0352-0), 2018-03-07
Supplement: 41419_2018_352_MOESM3_ESM.pdf [file 41419_2018_352_MOESM3_ESM.pdf]

A

|                                                  |   |                      |                  |                         |                     |                  |                  |                                                |                   |
|--------------------------------------------------|---|----------------------|------------------|-------------------------|---------------------|------------------|------------------|------------------------------------------------|-------------------|
| Each antibody is spotted in duplicate vertically |   | A                    | B                | C                       | D                   | E                | F                | G                                              | H                 |
|                                                  | 1 | POS                  | POS              | NEG                     | NEG                 | Akt<br>(P-S473)  | CREB<br>(P-S133) | ERK1<br>(P-T202/Y204)<br>ERK2<br>(P-Y185/Y187) | GSK3a<br>(P-S21)  |
|                                                  | 2 |                      |                  |                         |                     |                  |                  |                                                |                   |
|                                                  | 3 | GSK3b<br>(P-S9)      | HSP27<br>(P-S82) | JNK<br>(P-T183)         | MEK<br>(P-S217/221) | MKK3<br>(P-S189) | MKK6<br>(P-S207) | MSK2<br>(P-S360)                               | mTOR<br>(P-S2448) |
|                                                  | 4 |                      |                  |                         |                     |                  |                  |                                                |                   |
|                                                  | 5 | p38<br>(P-T180/Y182) | P53<br>(P-S15)   | P70S6K<br>(P-T421/S424) | RSK1<br>(P-S380)    | RSK2<br>(P-S386) | NEG              | NEG                                            | POS               |
| 6                                                |   |                      |                  |                         |                     |                  |                  |                                                |                   |

B

| Upregulated Markers | Fold Change |
|---------------------|-------------|
| MSK2                | 1.517       |
| P53                 | 1.560       |
| GSK3a               | 1.593       |
| mTOR                | 1.648       |
| P70S6k              | 1.648       |
| HSP27               | 1.650       |
| GSK3b               | 1.752       |
| P38                 | 1.760       |
| MKK3                | 1.771       |
| RSK2                | 2.343       |
