# Supplementary material for: CRLF1 promotes malignant phenotypes of papillary thyroid carcinoma by activating the MAPK/ERK and PI3K/AKT pathways
Source: Springer Nature journal article supplement (doi:10.1038/s41419-018-0352-0), 2018-03-07

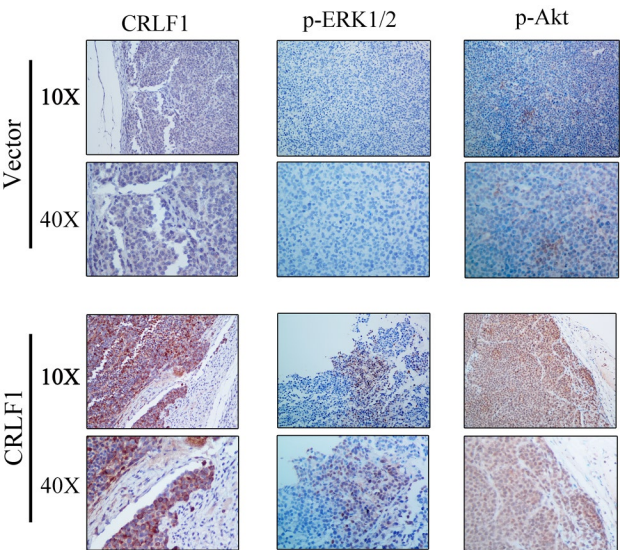

Supplement: 41419_2018_352_MOESM4_ESM.pdf [file 41419_2018_352_MOESM4_ESM.pdf]
